# Supplementary material for: Preparation of Bulk TiZrNbMoV and NbTiAlTaV High-Entropy Alloys by Powder Sintering
Source: MDPI journal article supplement (doi:10.3390/met11111748), 2021-10-31
Supplement: s1 [file s1]

# Preparation of Bulk TiZrNbMoV and NbTiAlTaV High-Entropy Alloys by Powder Sintering

Yaqi Wu <sup>1</sup>, Peter K. Liaw <sup>2</sup> and Yong Zhang <sup>1,\*</sup>

<sup>1</sup> State Key Laboratory of Advanced Metals and Materials, University of Science and Technology Beijing, Beijing 100083, China; wuyaqi0223@163.com

<sup>2</sup> Materials Science and Engineering at The University of Tennessee, Knoxville, TN 37996, USA; pliaw@utk.edu

\* Correspondence: drzhangy@ustb.edu.cn; Tel.: +110-62333073

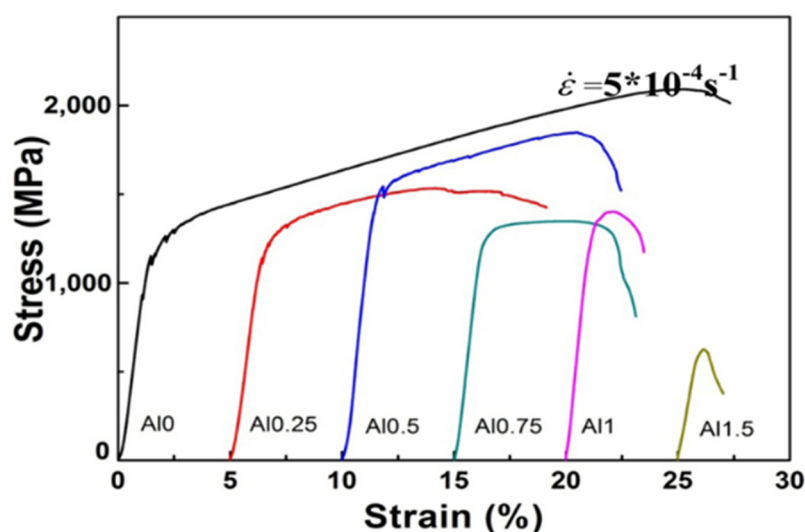

Al<sub>x</sub>NbTiMoV

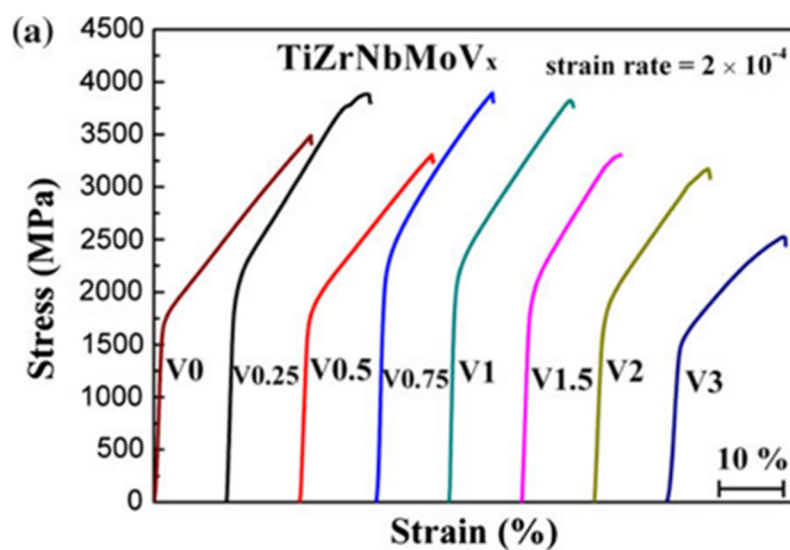

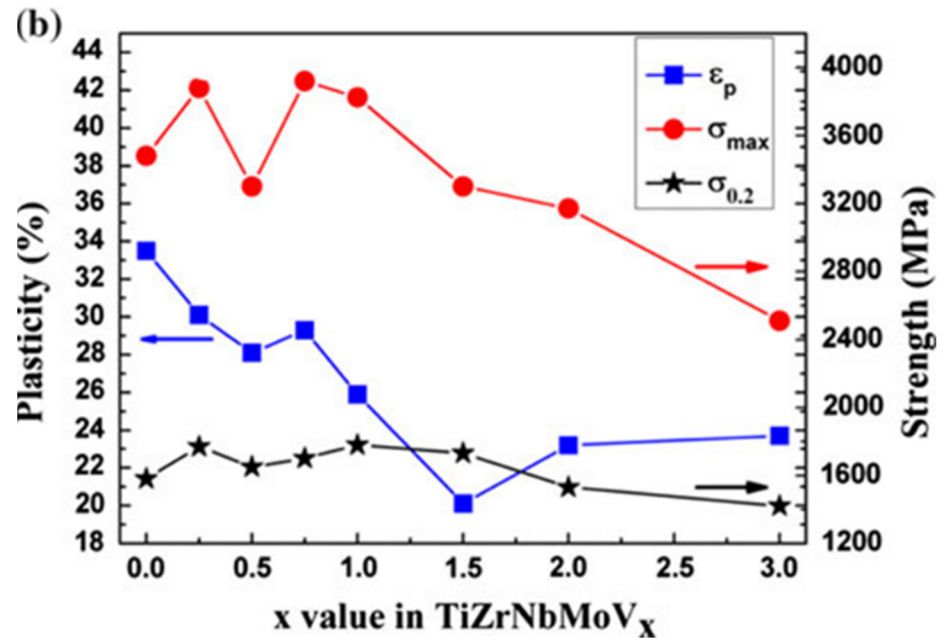

**Figure S1.** Stress - strain curve of  $\text{Al}_x\text{TiNbMoV}$  and  $\text{TiZrNbMoV}_x$  alloys (a) and variation of alloy plasticity with V atom ratio (b). [30,31].

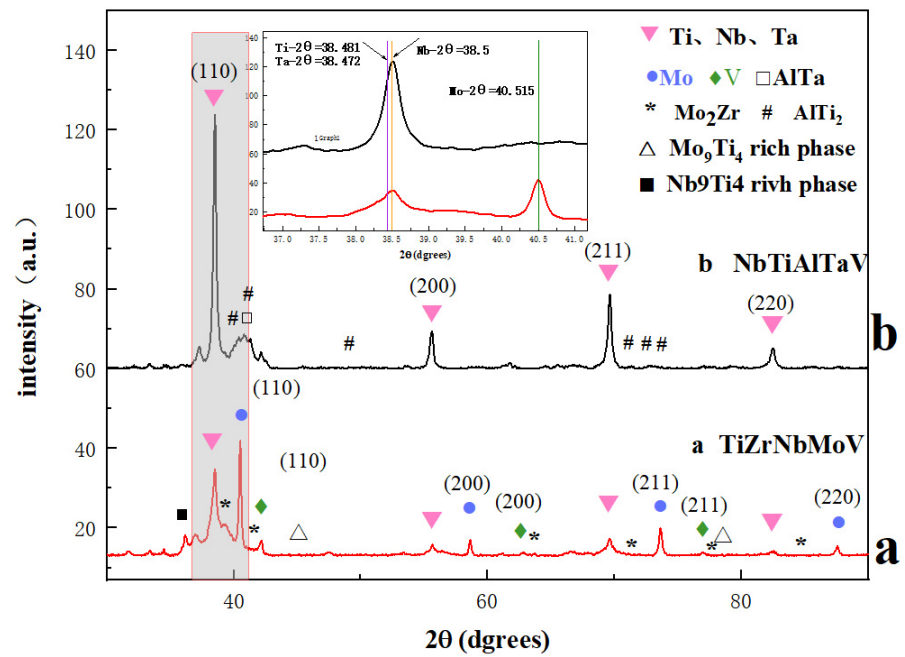

**Figure S2.** XRD patterns of elements labeled with diffraction peaks.

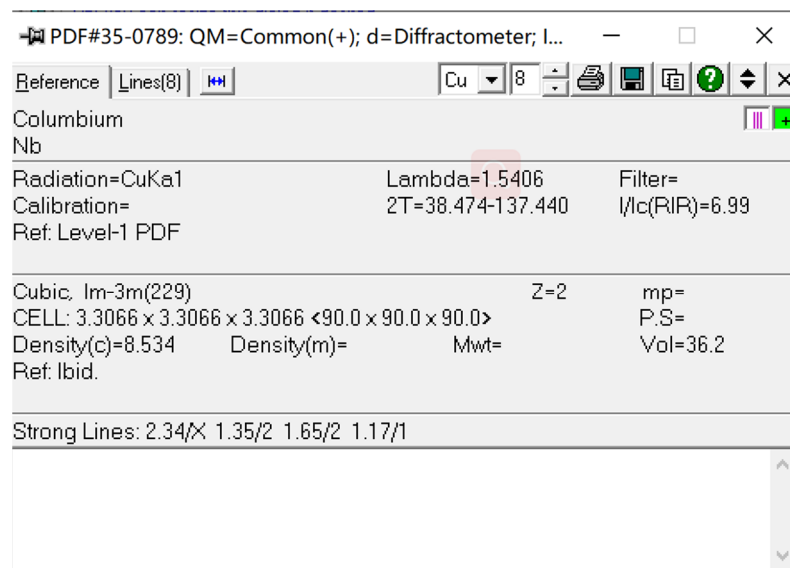

**Figure S3.** Details of X-ray diffraction spectra of Nb elements.

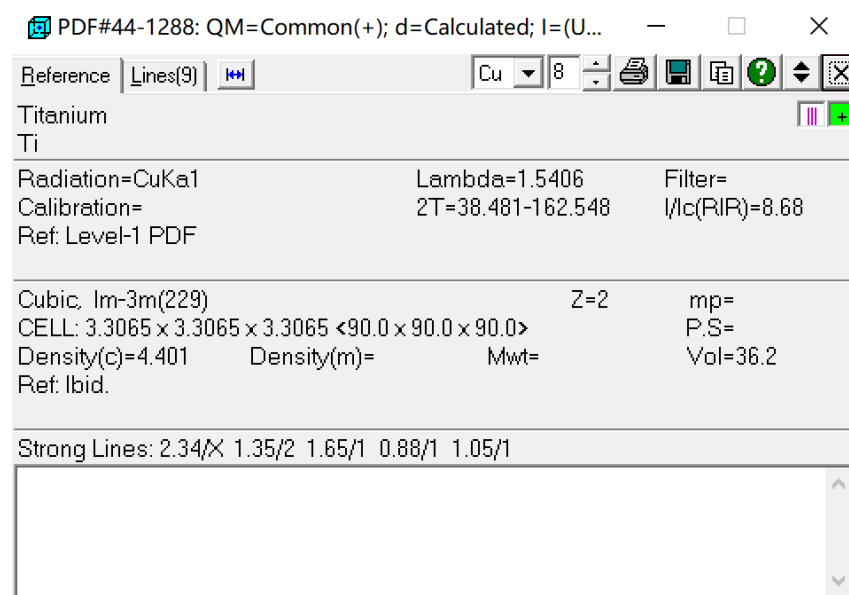

**Figure S4.** Details of X-ray diffraction spectra of Ti elements.

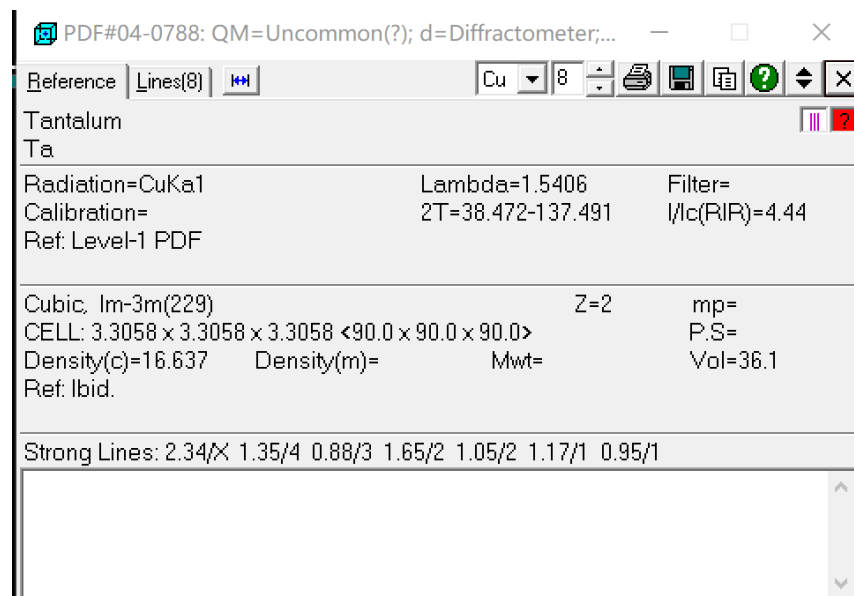

**Figure S5.** Details of X-ray diffraction spectra of Ta elements.

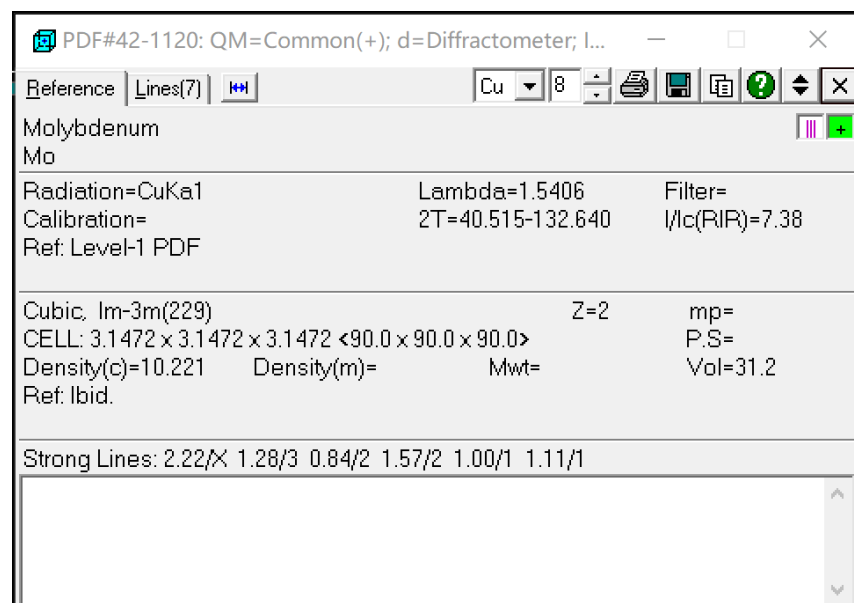

**Figure S6.** Details of X-ray diffraction spectra of Mo elements.

## Reference

29. Chen, S.Y.; Yang, X.; Dahmen, K.A.; Liaw, P.K.; Zhang, Y. Microstructures and Crackling Noise of Al<sub>x</sub>NbTiMoV High Entropy Alloys. *Entropy* **2014**, *16*, 870–884, doi:10.3390/e16020870.
30. Zhang, Y.; Yang, X.; Liaw, P.K. Alloy Design and Properties Optimization of High-Entropy Alloys. *JOM* **2012**, *64*, 830–838, doi:10.1007/s11837-012-0366-5.
