# Supplementary material for: Preparation of Bulk TiZrNbMoV and NbTiAlTaV High-Entropy Alloys by Powder Sintering
Source: MDPI journal article supplement (doi:10.3390/met11111748), 2021-10-31
Supplement: s1 [file s1]

Archive with 1 entries (1 files):
- metals-1391719-supplementary.pdf
